# Supplementary material for: Theoretical insights into the effect of metal co-substituted CeO 2 (111) surfaces on oxygen vacancy formation and chemical looping CO 2 assisted CH 4 conversion to synthesis gas
Source: Royal Society of Chemistry journal article supplement (doi:10.1039/d4cp03370a), 2024-12-02
Supplement: d4cp03370a1.pdf [file d4cp03370a1.pdf]

**Table S1.** Effective bader charge of substituted metal atoms with oxygen atoms near oxygen vacancies when Zn and other metal atoms are co-substituted on the CeO<sub>2</sub> (111) surface.

| Co-substituted metal | Zn    | M     | O <sub>1</sub> | O <sub>2</sub> | O <sub>3</sub> |
|----------------------|-------|-------|----------------|----------------|----------------|
| Zn-Rb                | -1.29 | -0.85 | 0.55           | 1.15           | 1.19           |
| Zn-Nd                | -1.23 | -2.04 | 1.21           | 1.22           | 1.21           |
| Zn-In                | -1.25 | -1.62 | 1.12           | 1.16           | 1.21           |
| Zn-K                 | -1.34 | -0.84 | 0.85           | 1.13           | 1.15           |
| Zn-Pb                | -1.24 | -1.70 | 1.09           | 1.13           | 1.23           |
| Zn-Na                | -1.33 | -0.84 | 0.81           | 1.15           | 1.15           |
| Zn-Cd                | -1.31 | -1.26 | 0.86           | 1.17           | 1.16           |
| Zn-Ag                | -1.32 | -1.06 | 0.97           | 1.05           | 1.20           |
| Zn-Ca                | -1.55 | -1.30 | 0.92           | 1.22           | 1.16           |
| Zn-Sc                | -1.32 | -2.10 | 1.17           | 1.25           | 1.20           |
| Zn-Sr                | -1.34 | -1.59 | 0.98           | 1.21           | 1.16           |
| Zn-Ba                | -1.32 | -1.58 | 0.97           | 1.19           | 1.16           |
| Zn-Mn                | -1.30 | -1.67 | 1.09           | 1.15           | 1.22           |
| Zn-Zr                | -1.24 | -2.31 | 1.23           | 1.23           | 1.21           |
| Zn-Mg                | -1.29 | -1.68 | 0.84           | 1.26           | 1.19           |
| Zn-Tl                | -1.28 | -1.19 | 1.01           | 1.08           | 1.19           |
| Zn-Ti                | -1.30 | -1.99 | 1.17           | 1.19           | 1.21           |
| Zn-Y                 | -1.24 | -2.21 | 1.25           | 1.26           | 1.20           |
| Zn-Hf                | -1.24 | -2.28 | 1.23           | 1.23           | 1.20           |
| Zn-La                | -1.30 | -2.12 | 1.14           | 1.23           | 1.21           |
| Zn-Ga                | -1.29 | -1.65 | 0.90           | 1.19           | 1.18           |
| Zn-Fe                | -1.32 | -1.68 | 1.04           | 1.14           | 1.21           |
| Zn-Al                | -1.28 | -2.43 | 0.89           | 1.37           | 1.17           |
| Zn-Sn                | -1.24 | -2.17 | 1.18           | 1.19           | 1.19           |
| Zn-Au                | -1.31 | -1.11 | 0.97           | 1.05           | 1.19           |
| Zn-Pr                | -1.22 | -2.23 | 1.22           | 1.22           | 1.22           |
| Zn-Rh                | -1.30 | -1.41 | 1.04           | 1.08           | 1.21           |

|       |       |       |      |      |      |
|-------|-------|-------|------|------|------|
| Zn-Bi | -1.24 | -1.87 | 1.14 | 1.15 | 1.21 |
| Zn-Ge | -1.24 | -2.09 | 1.17 | 1.17 | 1.20 |
| Zn-Cu | -1.30 | -1.04 | 0.86 | 1.11 | 1.18 |
| Zn-Pd | -1.31 | -1.20 | 1.00 | 1.19 | 1.21 |
| Zn-Cs | -1.28 | -0.86 | 0.53 | 1.14 | 1.20 |
| Zn-Cr | -1.27 | -1.76 | 1.02 | 1.15 | 1.20 |
| Zn-Nb | -1.28 | -2.63 | 1.21 | 1.23 | 1.21 |
| Zn-Ta | -1.28 | -2.51 | 1.19 | 1.21 | 1.19 |
| Zn-Pt | -1.30 | -1.32 | 1.02 | 1.07 | 1.20 |
| Zn-Co | -1.29 | -1.46 | 0.90 | 1.18 | 1.19 |
| Zn-Ru | -1.31 | -1.51 | 1.09 | 1.11 | 1.21 |
| Zn-Sb | -1.29 | -2.18 | 1.17 | 1.19 | 1.20 |
| Zn-V  | -1.26 | -1.85 | 1.03 | 1.18 | 1.21 |
| Zn-Ni | -1.30 | -1.14 | 0.90 | 1.11 | 1.18 |
| Zn-W  | -1.29 | -2.58 | 1.07 | 1.21 | 1.23 |
| Zn-Mo | -1.30 | -2.30 | 0.99 | 1.21 | 1.21 |
| Zn-Ir | -1.30 | -1.51 | 1.05 | 1.10 | 1.19 |
| Zn-Os | -1.30 | -1.78 | 1.09 | 1.12 | 1.19 |

---

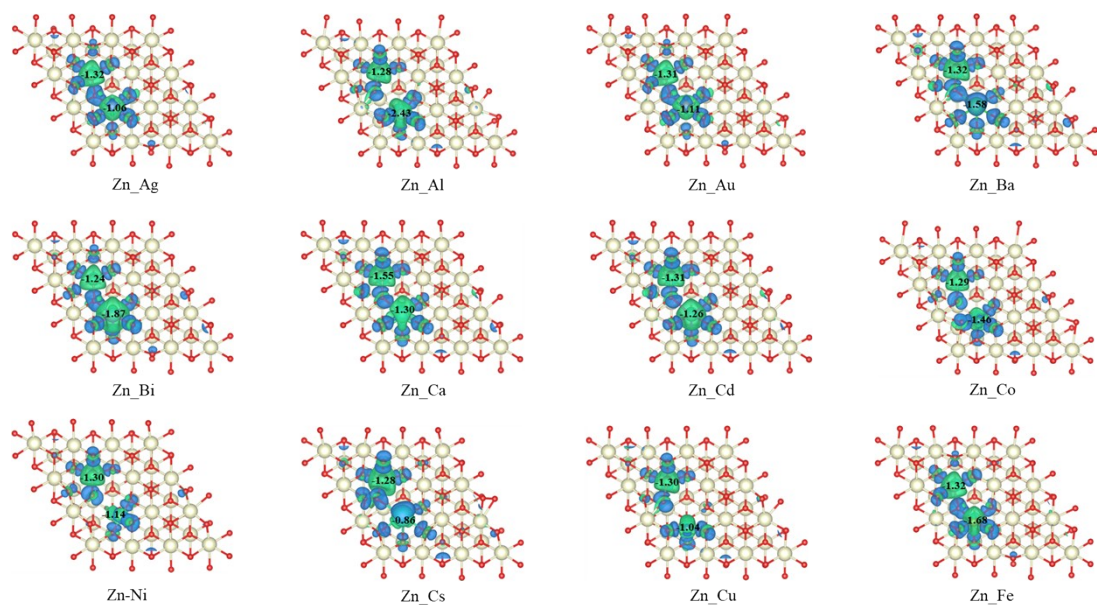

**Fig. S1** DFT calculated the charge-density difference of Zn and other metal atoms co-substituted CeO<sub>2</sub> (111). (Other metal ions are Ag, Al, Au, Ba, Bi, Ca, Cd, Co, Ni, Cs, Cu and Fe.)

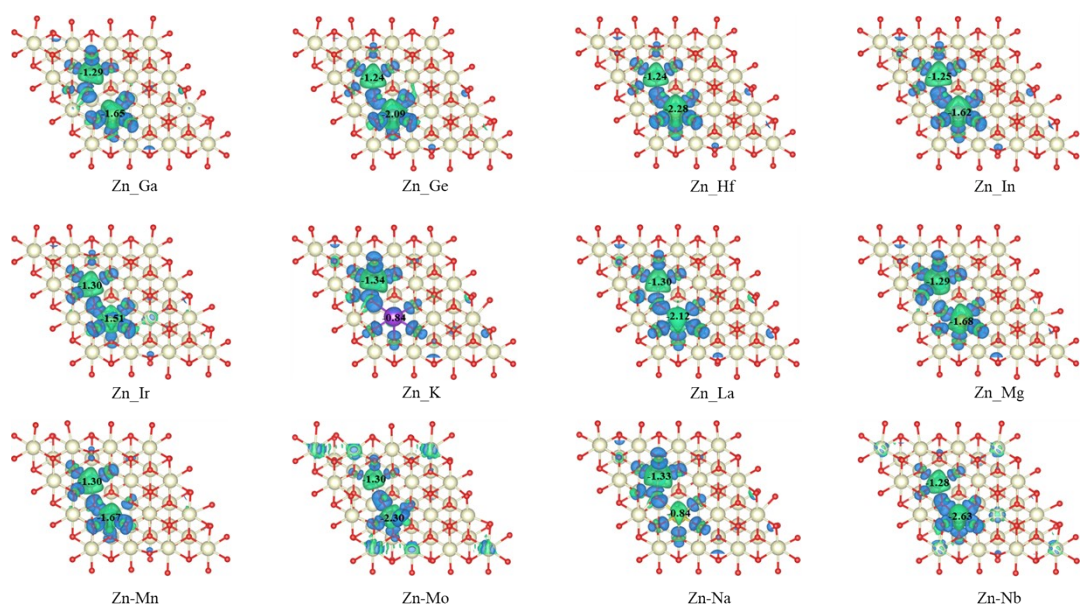

**Fig. S2** DFT calculated the charge-density difference of Zn and other metal atoms co-substituted CeO<sub>2</sub> (111). (Other metal ions are Ga, Ge, Hf, In, Ir, K, La, Mg, Mn, Mo, Na and Nb.)

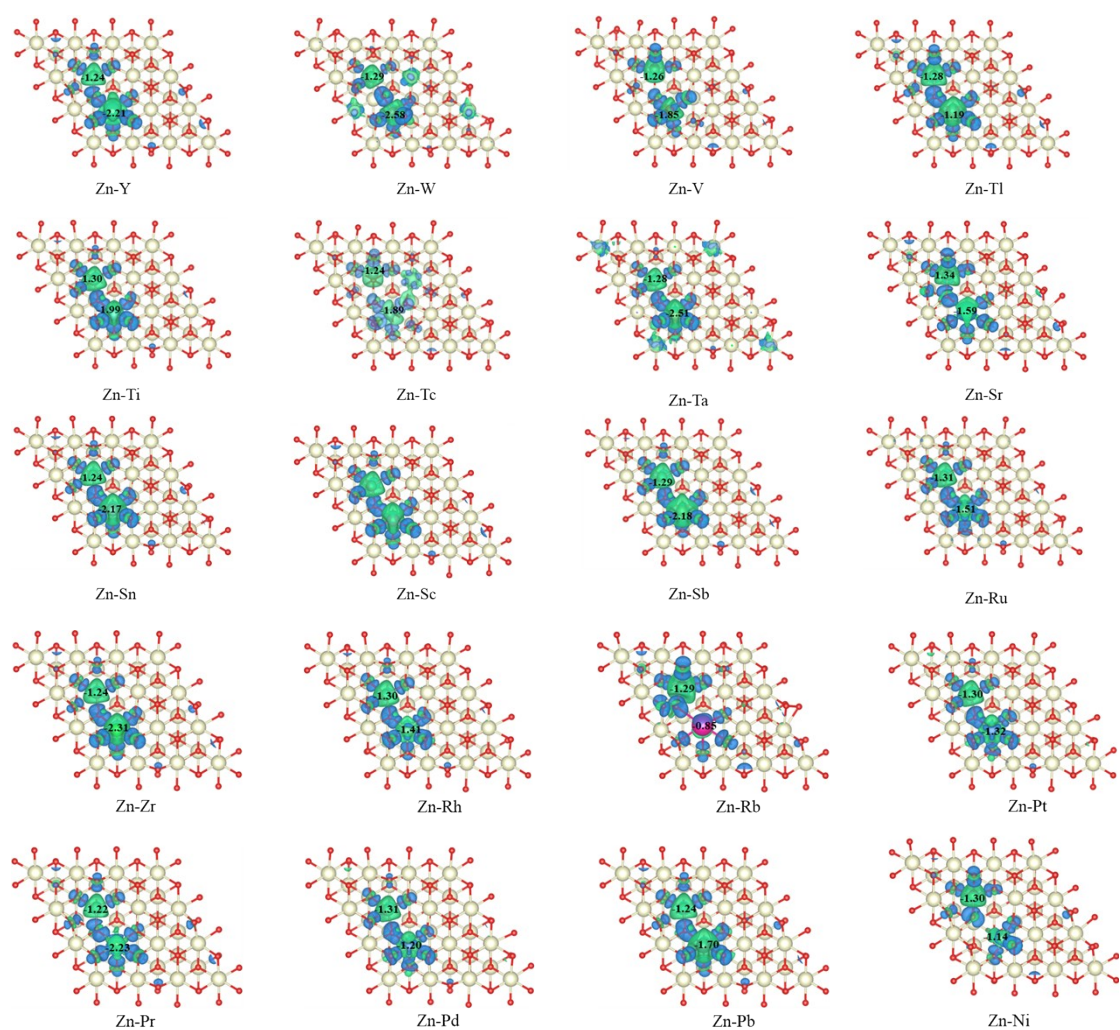

**Fig. S3** DFT calculated the charge-density difference of Zn and other metal atoms co-substituted  $\text{CeO}_2$  (111). (Other metal ions are Y, W, V, Tl, Ti, Tc, Ta, Sr, Sn, Sc, Sb, Ru, Zr, Rh, Rb, Pt, Pr, Pd, Pb and Ni.)

**Table S2.** Adsorption sites and adsorption energies ( $E_{\text{ads}}$ ) of  $\text{CH}_4$  in chemical looping dry reforming of methane on the surface of pristine  $\text{CeO}_2$  (111) as well as on the surface of Zn and Nd co-substituted  $\text{CeO}_2$  (111).

| pristine $\text{CeO}_2$ (111)                 |                     |                         |                         |                          |                          |                     |                     |
|-----------------------------------------------|---------------------|-------------------------|-------------------------|--------------------------|--------------------------|---------------------|---------------------|
| Adsorption sites                              | Ce-Top <sub>1</sub> | Ce-Top <sub>2</sub>     | O-Top                   | Oxygen Vacancy           | O-O-Bridge               | Ce-O-Bridge         | Hollow              |
| $E_{\text{ads}}/\text{eV}$                    | -0.71               | -0.53                   | -0.20                   | -0.83                    | -0.14                    | -0.15               | -0.19               |
| Zn and Nd co-substituted $\text{CeO}_2$ (111) |                     |                         |                         |                          |                          |                     |                     |
| Adsorption sites                              | Ce-Top              | Zn-Top                  | Nd-Top                  | O-Top <sub>1</sub>       | O-Top <sub>2</sub>       | O-Top <sub>3</sub>  | O-Top <sub>4</sub>  |
| $E_{\text{ads}}/\text{eV}$                    | -0.28               | -0.27                   | 0.65                    | 0.82                     | -0.16                    | 0.98                | 0.77                |
| Adsorption sites                              | Oxygen Vacancy      | O-O-Bridge <sub>1</sub> | O-O-Bridge <sub>2</sub> | Ce-O-Bridge <sub>1</sub> | Ce-O-Bridge <sub>2</sub> | Hollow <sub>1</sub> | Hollow <sub>2</sub> |
| $E_{\text{ads}}/\text{eV}$                    | 0.44                | -0.20                   | 0.95                    | -0.21                    | -0.18                    | -0.39               | -0.29               |

**Table S3.** Adsorption sites and adsorption energies ( $E_{\text{ads}}$ ) of  $\text{CH}_3$  in chemical looping dry reforming of methane on the surface of pristine  $\text{CeO}_2$  (111) as well as on the surface of Zn and Nd co-substituted  $\text{CeO}_2$  (111).

| pristine $\text{CeO}_2$ (111)                 |                     |                         |                         |                          |                          |                     |                     |
|-----------------------------------------------|---------------------|-------------------------|-------------------------|--------------------------|--------------------------|---------------------|---------------------|
| Adsorption sites                              | Ce-Top <sub>1</sub> | Ce-Top <sub>2</sub>     | O-Top                   | Oxygen Vacancy           | O-O-Bridge               | Ce-O-Bridge         | Hollow              |
| $E_{\text{ads}}/\text{eV}$                    | -1.88               | -1.88                   | -2.59                   | -1.63                    | -0.59                    | -0.79               | -1.88               |
| Zn and Nd co-substituted $\text{CeO}_2$ (111) |                     |                         |                         |                          |                          |                     |                     |
| Adsorption sites                              | Ce-Top              | Zn-Top                  | Nd-Top                  | O-Top <sub>1</sub>       | O-Top <sub>2</sub>       | O-Top <sub>3</sub>  | O-Top <sub>4</sub>  |
| $E_{\text{ads}}/\text{eV}$                    | -0.42               | -4.22                   | 0.48                    | -3.60                    | -3.69                    | -3.75               | -4.26               |
| Adsorption sites                              | Oxygen Vacancy      | O-O-Bridge <sub>1</sub> | O-O-Bridge <sub>2</sub> | Ce-O-Bridge <sub>1</sub> | Ce-O-Bridge <sub>2</sub> | Hollow <sub>1</sub> | Hollow <sub>2</sub> |
| $E_{\text{ads}}/\text{eV}$                    | 0.35                | -3.71                   | -4.31                   | -2.61                    | -3.71                    | 0.57                | -0.56               |

**Table S4.** Adsorption sites and adsorption energies ( $E_{\text{ads}}$ ) of  $\text{CH}_2$  in chemical looping dry reforming of methane on the surface of pristine  $\text{CeO}_2$  (111) as well as on the surface of Zn and Nd co-substituted  $\text{CeO}_2$  (111).

| pristine $\text{CeO}_2$ (111)                 |                     |                         |                         |                          |                          |                     |                     |
|-----------------------------------------------|---------------------|-------------------------|-------------------------|--------------------------|--------------------------|---------------------|---------------------|
| Adsorption sites                              | Ce-Top <sub>1</sub> | Ce-Top <sub>2</sub>     | O-Top                   | Oxygen Vacancy           | O-O-Bridge               | Ce-O-Bridge         | Hollow              |
| $E_{\text{ads}}/\text{eV}$                    | -2.54               | -2.54                   | -3.81                   | -2.51                    | -2.54                    | -3.90               | -2.54               |
| Zn and Nd co-substituted $\text{CeO}_2$ (111) |                     |                         |                         |                          |                          |                     |                     |
| Adsorption sites                              | Ce-Top              | Zn-Top                  | Nd-Top                  | O-Top <sub>1</sub>       | O-Top <sub>2</sub>       | O-Top <sub>3</sub>  | O-Top <sub>4</sub>  |
| $E_{\text{ads}}/\text{eV}$                    | -3.76               | -4.81                   | -4.73                   | -3.62                    | -3.82                    | -3.64               | -5.65               |
| Adsorption sites                              | Oxygen Vacancy      | O-O-Bridge <sub>1</sub> | O-O-Bridge <sub>2</sub> | Ce-O-Bridge <sub>1</sub> | Ce-O-Bridge <sub>2</sub> | Hollow <sub>1</sub> | Hollow <sub>2</sub> |
| $E_{\text{ads}}/\text{eV}$                    | -3.73               | -4.82                   | -4.79                   | -3.76                    | -3.75                    | -3.77               | -4.79               |



**Table S5.** Adsorption sites and adsorption energies ( $E_{\text{ads}}$ ) of CH in chemical looping dry reforming of methane on the surface of pristine  $\text{CeO}_2$  (111) as well as on the surface of Zn and Nd co-substituted  $\text{CeO}_2$  (111).

| pristine $\text{CeO}_2$ (111)                 |                     |                         |                         |                          |                          |                     |                     |
|-----------------------------------------------|---------------------|-------------------------|-------------------------|--------------------------|--------------------------|---------------------|---------------------|
| Adsorption sites                              | Ce-Top <sub>1</sub> | Ce-Top <sub>2</sub>     | O-Top                   | Oxygen Vacancy           | O-O-Bridge               | Ce-O-Bridge         | Hollow              |
| $E_{\text{ads}}/\text{eV}$                    | -3.34               | -3.34                   | -5.16                   | -3.34                    | -3.34                    | -5.13               | -3.34               |
| Zn and Nd co-substituted $\text{CeO}_2$ (111) |                     |                         |                         |                          |                          |                     |                     |
| Adsorption sites                              | Ce-Top              | Zn-Top                  | Nd-Top                  | O-Top <sub>1</sub>       | O-Top <sub>2</sub>       | O-Top <sub>3</sub>  | O-Top <sub>4</sub>  |
| $E_{\text{ads}}/\text{eV}$                    | -5.21               | -7.21                   | -5.11                   | -5.04                    | -5.93                    | -5.97               | -6.21               |
| Adsorption sites                              | Oxygen Vacancy      | O-O-Bridge <sub>1</sub> | O-O-Bridge <sub>2</sub> | Ce-O-Bridge <sub>1</sub> | Ce-O-Bridge <sub>2</sub> | Hollow <sub>1</sub> | Hollow <sub>2</sub> |
| $E_{\text{ads}}/\text{eV}$                    | -6.04               | -5.20                   | -6.77                   | -5.04                    | -5.22                    | -5.99               | -5.22               |

**Table S6.** Adsorption sites and adsorption energies ( $E_{\text{ads}}$ ) of C in chemical looping dry reforming of methane on the surface of pristine  $\text{CeO}_2$  (111) as well as on the surface of Zn and Nd co-substituted  $\text{CeO}_2$  (111).

| pristine $\text{CeO}_2$ (111)                 |                     |                         |                         |                          |                          |                     |                     |
|-----------------------------------------------|---------------------|-------------------------|-------------------------|--------------------------|--------------------------|---------------------|---------------------|
| Adsorption sites                              | Ce-Top <sub>1</sub> | Ce-Top <sub>2</sub>     | O-Top                   | Oxygen Vacancy           | O-O-Bridge               | Ce-O-Bridge         | Hollow              |
| $E_{\text{ads}}/\text{eV}$                    | -2.92               | -2.92                   | -6.50                   | -2.92                    | -6.50                    | -6.58               | -2.91               |
| Zn and Nd co-substituted $\text{CeO}_2$ (111) |                     |                         |                         |                          |                          |                     |                     |
| Adsorption sites                              | Ce-Top              | Zn-Top                  | Nd-Top                  | O-Top <sub>1</sub>       | O-Top <sub>2</sub>       | O-Top <sub>3</sub>  | O-Top <sub>4</sub>  |
| $E_{\text{ads}}/\text{eV}$                    | -4.90               | -8.24                   | -6.68                   | -7.01                    | -7.47                    | -7.29               | -8.48               |
| Adsorption sites                              | Oxygen Vacancy      | O-O-Bridge <sub>1</sub> | O-O-Bridge <sub>2</sub> | Ce-O-Bridge <sub>1</sub> | Ce-O-Bridge <sub>2</sub> | Hollow <sub>1</sub> | Hollow <sub>2</sub> |
| $E_{\text{ads}}/\text{eV}$                    | -7.28               | -7.46                   | -8.48                   | -7.35                    | -7.46                    | -8.24               | -3.97               |

**Table S7.** Adsorption sites and adsorption energies ( $E_{\text{ads}}$ ) of H in chemical looping dry reforming of methane on the surface of pristine  $\text{CeO}_2$  (111) as well as on the surface of Zn and Nd co-substituted  $\text{CeO}_2$  (111).

| pristine $\text{CeO}_2$ (111)                 |                     |                         |                         |                          |                          |                     |                     |
|-----------------------------------------------|---------------------|-------------------------|-------------------------|--------------------------|--------------------------|---------------------|---------------------|
| Adsorption sites                              | Ce-Top <sub>1</sub> | Ce-Top <sub>2</sub>     | O-Top                   | Oxygen Vacancy           | O-O-Bridge               | Ce-O-Bridge         | Hollow              |
| $E_{\text{ads}}/\text{eV}$                    | -2.32               | -2.32                   | -3.44                   | -2.13                    | -0.52                    | -3.75               | -2.30               |
| Zn and Nd co-substituted $\text{CeO}_2$ (111) |                     |                         |                         |                          |                          |                     |                     |
| Adsorption sites                              | Ce-Top              | Zn-Top                  | Nd-Top                  | O-Top <sub>1</sub>       | O-Top <sub>2</sub>       | O-Top <sub>3</sub>  | O-Top <sub>4</sub>  |
| $E_{\text{ads}}/\text{eV}$                    | 0.84                | -5.13                   | -0.17                   | -4.58                    | -4.72                    | -4.76               | -5.12               |
| Adsorption sites                              | Oxygen Vacancy      | O-O-Bridge <sub>1</sub> | O-O-Bridge <sub>2</sub> | Ce-O-Bridge <sub>1</sub> | Ce-O-Bridge <sub>2</sub> | Hollow <sub>1</sub> | Hollow <sub>2</sub> |
| $E_{\text{ads}}/\text{eV}$                    | -4.25               | 0.79                    | -5.20                   | -4.58                    | -4.73                    | -3.39               | 0.29                |

**Table S8.** Adsorption sites and adsorption energies ( $E_{\text{ads}}$ ) of O in chemical looping dry reforming of methane on the surface of pristine  $\text{CeO}_2$  (111) as well as on the surface of Zn and Nd co-substituted  $\text{CeO}_2$  (111).

| pristine $\text{CeO}_2$ (111)                 |                     |                         |                         |                          |                          |                     |                     |
|-----------------------------------------------|---------------------|-------------------------|-------------------------|--------------------------|--------------------------|---------------------|---------------------|
| Adsorption sites                              | Ce-Top <sub>1</sub> | Ce-Top <sub>2</sub>     | Oxygen Vacancy          | Ce-O-Bridge              | Hollow                   |                     |                     |
| $E_{\text{ads}}/\text{eV}$                    | -6.26               | -6.25                   | -6.26                   | -3.53                    | -6.26                    |                     |                     |
| Zn and Nd co-substituted $\text{CeO}_2$ (111) |                     |                         |                         |                          |                          |                     |                     |
| Adsorption sites                              | Ce-Top              | Zn-Top                  | Nd-Top                  | O-Top <sub>1</sub>       | O-Top <sub>2</sub>       | O-Top <sub>3</sub>  | O-Top <sub>4</sub>  |
| $E_{\text{ads}}/\text{eV}$                    | -2.67               | -3.16                   | -1.35                   | -3.25                    | -2.62                    | -3.38               | -3.30               |
| Adsorption sites                              | Oxygen Vacancy      | O-O-Bridge <sub>1</sub> | O-O-Bridge <sub>2</sub> | Ce-O-Bridge <sub>1</sub> | Ce-O-Bridge <sub>2</sub> | Hollow <sub>1</sub> | Hollow <sub>2</sub> |
| $E_{\text{ads}}/\text{eV}$                    | -1.29               | -2.47                   | -0.46                   | -2.51                    | -3.62                    | -0.70               | -1.47               |

**Table S9.** Adsorption sites and adsorption energies ( $E_{\text{ads}}$ ) of CO in chemical looping dry reforming of methane on the surface of pristine  $\text{CeO}_2$  (111) as well as on the surface of Zn and Nd co-substituted  $\text{CeO}_2$  (111).

| pristine $\text{CeO}_2$ (111)                 |                     |                         |                         |                          |                          |                     |                     |
|-----------------------------------------------|---------------------|-------------------------|-------------------------|--------------------------|--------------------------|---------------------|---------------------|
| Adsorption sites                              | Ce-Top <sub>1</sub> | Ce-Top <sub>2</sub>     | O-Top                   | Oxygen Vacancy           | O-O-Bridge               | Ce-O-Bridge         | Hollow              |
| $E_{\text{ads}}/\text{eV}$                    | -0.81               | -0.65                   | -0.45                   | -0.77                    | -0.30                    | -0.48               | -0.31               |
| Zn and Nd co-substituted $\text{CeO}_2$ (111) |                     |                         |                         |                          |                          |                     |                     |
| Adsorption sites                              | Ce-Top              | Zn-Top                  | Nd-Top                  | O-Top <sub>1</sub>       | O-Top <sub>2</sub>       | O-Top <sub>3</sub>  | O-Top <sub>4</sub>  |
| $E_{\text{ads}}/\text{eV}$                    | 0.53                | -0.59                   | -0.38                   | 0.43                     | -0.17                    | -0.17               | -3.67               |
| Adsorption sites                              | Oxygen Vacancy      | O-O-Bridge <sub>1</sub> | O-O-Bridge <sub>2</sub> | Ce-O-Bridge <sub>1</sub> | Ce-O-Bridge <sub>2</sub> | Hollow <sub>1</sub> | Hollow <sub>2</sub> |
| $E_{\text{ads}}/\text{eV}$                    | -0.46               | -0.39                   | -0.33                   | 0.44                     | -0.41                    | -0.35               | 0.44                |

**Table S10.** Adsorption sites and adsorption energies ( $E_{\text{ads}}$ ) of  $\text{CO}_2$  in chemical looping dry reforming of methane on the surface of pristine  $\text{CeO}_2$  (111) as well as on the surface of Zn and Nd co-substituted  $\text{CeO}_2$  (111).

| pristine $\text{CeO}_2$ (111)                 |                     |                         |                         |                          |                          |                     |                     |
|-----------------------------------------------|---------------------|-------------------------|-------------------------|--------------------------|--------------------------|---------------------|---------------------|
| Adsorption sites                              | Ce-Top <sub>1</sub> | Ce-Top <sub>2</sub>     | O-Top                   | Oxygen Vacancy           | O-O-Bridge               | Ce-O-Bridge         | Hollow              |
| $E_{\text{ads}}/\text{eV}$                    | -0.86               | -0.81                   | -0.68                   | -0.23                    | -0.79                    | -0.62               | -0.91               |
| Zn and Nd co-substituted $\text{CeO}_2$ (111) |                     |                         |                         |                          |                          |                     |                     |
| Adsorption sites                              | Ce-Top              | Zn-Top                  | Nd-Top                  | O-Top <sub>1</sub>       | O-Top <sub>2</sub>       | O-Top <sub>3</sub>  | O-Top <sub>4</sub>  |
| $E_{\text{ads}}/\text{eV}$                    | 0.60                | 0.44                    | -0.43                   | 0.69                     | -0.44                    | -0.28               | -0.26               |
| Adsorption sites                              | Oxygen Vacancy      | O-O-Bridge <sub>1</sub> | O-O-Bridge <sub>2</sub> | Ce-O-Bridge <sub>1</sub> | Ce-O-Bridge <sub>2</sub> | Hollow <sub>1</sub> | Hollow <sub>2</sub> |
| $E_{\text{ads}}/\text{eV}$                    | 0.38                | 0.71                    | -0.59                   | 0.51                     | 0.40                     | 0.35                | 0.41                |

**Table S11.** Adsorption sites and adsorption energies ( $E_{\text{ads}}$ ) of  $\text{H}_2$  in chemical looping dry reforming of methane on the surface of pristine  $\text{CeO}_2$  (111) as well as on the surface of Zn and Nd co-substituted  $\text{CeO}_2$  (111).

| pristine $\text{CeO}_2$ (111)                 |                     |                         |                         |                          |                          |                     |                     |
|-----------------------------------------------|---------------------|-------------------------|-------------------------|--------------------------|--------------------------|---------------------|---------------------|
| Adsorption sites                              | Ce-Top <sub>1</sub> | Ce-Top <sub>2</sub>     | O-Top                   | Oxygen Vacancy           | O-O-Bridge               | Ce-O-Bridge         | Hollow              |
| $E_{\text{ads}}/\text{eV}$                    | -0.51               | -0.58                   | -0.04                   | -0.04                    | -0.50                    | -0.54               | -0.14               |
| Zn and Nd co-substituted $\text{CeO}_2$ (111) |                     |                         |                         |                          |                          |                     |                     |
| Adsorption sites                              | Ce-Top              | Zn-Top                  | Nd-Top                  | O-Top <sub>1</sub>       | O-Top <sub>2</sub>       | O-Top <sub>3</sub>  | O-Top <sub>4</sub>  |
| $E_{\text{ads}}/\text{eV}$                    | -0.20               | -0.15                   | 0.72                    | 0.87                     | 0.80                     | 0.80                | 0.76                |
| Adsorption sites                              | Oxygen Vacancy      | O-O-Bridge <sub>1</sub> | O-O-Bridge <sub>2</sub> | Ce-O-Bridge <sub>1</sub> | Ce-O-Bridge <sub>2</sub> | Hollow <sub>1</sub> | Hollow <sub>2</sub> |
| $E_{\text{ads}}/\text{eV}$                    | 0.68                | 0.78                    | 0.74                    | 0.78                     | 0.77                     | 0.71                | 0.77                |

**Table S12.** Adsorption sites and adsorption energies ( $E_{\text{ads}}$ ) of  $\text{CH}_3\text{O}$  in chemical looping dry reforming of methane on the surface of pristine  $\text{CeO}_2$  (111) as well as on the surface of Zn and Nd co-substituted  $\text{CeO}_2$  (111).

| pristine $\text{CeO}_2$ (111)                 |                     |                         |                         |                          |                          |                     |                     |
|-----------------------------------------------|---------------------|-------------------------|-------------------------|--------------------------|--------------------------|---------------------|---------------------|
| Adsorption sites                              | Ce-Top <sub>1</sub> | Ce-Top <sub>2</sub>     | O-Top                   | Oxygen Vacancy           | O-O-Bridge               | Ce-O-Bridge         | Hollow              |
| $E_{\text{ads}}/\text{eV}$                    | -4.04               | -4.05                   | -4.04                   | -4.06                    | -4.06                    | -4.06               | -4.05               |
| Zn and Nd co-substituted $\text{CeO}_2$ (111) |                     |                         |                         |                          |                          |                     |                     |
| Adsorption sites                              | Ce-Top              | Zn-Top                  | Nd-Top                  | O-Top <sub>1</sub>       | O-Top <sub>2</sub>       | O-Top <sub>3</sub>  | O-Top <sub>4</sub>  |
| $E_{\text{ads}}/\text{eV}$                    | -1.97               | -1.02                   | -1.91                   | -0.89                    | -0.66                    | -1.98               | -1.44               |
| Adsorption sites                              | Oxygen Vacancy      | O-O-Bridge <sub>1</sub> | O-O-Bridge <sub>2</sub> | Ce-O-Bridge <sub>1</sub> | Ce-O-Bridge <sub>2</sub> | Hollow <sub>1</sub> | Hollow <sub>2</sub> |
| $E_{\text{ads}}/\text{eV}$                    | -1.03               | 0.95                    | -1.37                   | -0.61                    | -1.97                    | -1.96               | -1.83               |



**Table S13.** Adsorption sites and adsorption energies ( $E_{\text{ads}}$ ) of  $\text{CH}_2\text{O}$  in chemical looping dry reforming of methane on the surface of pristine  $\text{CeO}_2$  (111) as well as on the surface of Zn and Nd co-substituted  $\text{CeO}_2$  (111).

| pristine $\text{CeO}_2$ (111)                 |                     |                         |                         |                          |                          |                     |                     |
|-----------------------------------------------|---------------------|-------------------------|-------------------------|--------------------------|--------------------------|---------------------|---------------------|
| Adsorption sites                              | Ce-Top <sub>1</sub> | Ce-Top <sub>2</sub>     | O-Top                   | Oxygen Vacancy           | O-O-Bridge               | Ce-O-Bridge         | Hollow              |
| $E_{\text{ads}}/\text{eV}$                    | -1.34               | -1.34                   | -1.87                   | -1.37                    | -1.34                    | -2.03               | -2.02               |
| Zn and Nd co-substituted $\text{CeO}_2$ (111) |                     |                         |                         |                          |                          |                     |                     |
| Adsorption sites                              | Ce-Top              | Zn-Top                  | Nd-Top                  | O-Top <sub>1</sub>       | O-Top <sub>2</sub>       | O-Top <sub>3</sub>  | O-Top <sub>4</sub>  |
| $E_{\text{ads}}/\text{eV}$                    | -0.01               | -0.22                   | -1.17                   | 0.01                     | -0.02                    | -0.28               | -5.15               |
| Adsorption sites                              | Oxygen Vacancy      | O-O-Bridge <sub>1</sub> | O-O-Bridge <sub>2</sub> | Ce-O-Bridge <sub>1</sub> | Ce-O-Bridge <sub>2</sub> | Hollow <sub>1</sub> | Hollow <sub>2</sub> |
| $E_{\text{ads}}/\text{eV}$                    | 0.20                | -0.19                   | -1.11                   | -0.29                    | -0.11                    | -0.20               | -0.05               |

**Table S14.** Adsorption sites and adsorption energies ( $E_{\text{ads}}$ ) of CHO in chemical looping dry reforming of methane on the surface of pristine  $\text{CeO}_2$  (111) as well as on the surface of Zn and Nd co-substituted  $\text{CeO}_2$  (111).

| pristine $\text{CeO}_2$ (111)                 |                     |                         |                         |                          |                          |                     |                     |
|-----------------------------------------------|---------------------|-------------------------|-------------------------|--------------------------|--------------------------|---------------------|---------------------|
| Adsorption sites                              | Ce-Top <sub>1</sub> | Ce-Top <sub>2</sub>     | O-Top                   | Oxygen Vacancy           | O-O-Bridge               | Ce-O-Bridge         | Hollow              |
| $E_{\text{ads}}/\text{eV}$                    | -1.72               | -0.90                   | -4.10                   | -1.71                    | -0.95                    | -3.99               | -1.70               |
| Zn and Nd co-substituted $\text{CeO}_2$ (111) |                     |                         |                         |                          |                          |                     |                     |
| Adsorption sites                              | Ce-Top              | Zn-Top                  | Nd-Top                  | O-Top <sub>1</sub>       | O-Top <sub>2</sub>       | O-Top <sub>3</sub>  | O-Top <sub>4</sub>  |
| $E_{\text{ads}}/\text{eV}$                    | -4.75               | -4.62                   | -2.94                   | -3.81                    | -4.92                    | -3.91               | -4.62               |
| Adsorption sites                              | Oxygen Vacancy      | O-O-Bridge <sub>1</sub> | O-O-Bridge <sub>2</sub> | Ce-O-Bridge <sub>1</sub> | Ce-O-Bridge <sub>2</sub> | Hollow <sub>1</sub> | Hollow <sub>2</sub> |
| $E_{\text{ads}}/\text{eV}$                    | 5.99                | -4.97                   | -5.57                   | -3.80                    | -4.00                    | -4.23               | -2.84               |

**Table S15.** The zero-point energies (ZPE), the product of the vibrational entropy and temperature (TS), the optimized structural energies ( $E_{\text{SCF}}$ ), the Gibbs free energy correction values ( $G_{\text{correction}}$ ), the Gibbs free energies (G) for gas-phase molecules have been obtained from the frequency calculations at 1073.15K.

| intermediates   | Gas molecule            |      |                             |                         |        |
|-----------------|-------------------------|------|-----------------------------|-------------------------|--------|
|                 | ZPE                     | TS   | $E_{\text{SCF}}$            | $G_{\text{correction}}$ | G      |
| CH <sub>4</sub> | 1.19, 1.19 <sup>1</sup> | 2.81 | -24.03, -24.03 <sup>1</sup> | -1.07                   | -25.10 |
| CO              | 0.13, 0.13 <sup>1</sup> | 2.70 | -14.79, -14.79 <sup>1</sup> | -2.23                   | -17.02 |
| O <sub>2</sub>  | 0.10, 0.10 <sup>1</sup> | 2.78 | -9.86, -9.86 <sup>1</sup>   | -2.34                   | -12.19 |
| H <sub>2</sub>  | 0.27, 0.27 <sup>1</sup> | 1.86 | -6.76, -6.76 <sup>1</sup>   | -1.27                   | -8.03  |
| CO <sub>2</sub> | 0.31, 0.31 <sup>1</sup> | 3.20 | -22.99, -22.99 <sup>1</sup> | -2.40                   | -25.40 |

1. ACS Catalysis, 2023, 13, 1381-1399

**Table S16.** The zero-point energies (ZPE), the product of the vibrational entropy and temperature (TS), the optimized structural energies ( $E_{\text{SCF}}$ ), the Gibbs free energy correction values ( $G_{\text{correction}}$ ), the Gibbs free energies (G) for gas-phase molecules adsorbed on the surface of pristine CeO<sub>2</sub> (111) have been obtained from the frequency calculations at 1073.15K.

| intermediates     | pristine CeO <sub>2</sub> (111) |      |                  |                         |         |
|-------------------|---------------------------------|------|------------------|-------------------------|---------|
|                   | ZPE                             | TS   | $E_{\text{SCF}}$ | $G_{\text{correction}}$ | G       |
| CH <sub>4</sub>   | 1.23                            | 1.83 | -677.57          | 0.09                    | -677.48 |
| CH <sub>3</sub>   | 1.00                            | 1.04 | -673.49          | 0.39                    | -673.11 |
| CH <sub>2</sub>   | 0.67                            | 0.97 | -668.71          | 0.13                    | -668.58 |
| CH                | 0.38                            | 0.43 | -663.97          | 0.17                    | -663.81 |
| C                 | 0.11                            | 0.55 | -660.61          | -0.24                   | -660.84 |
| H                 | 0.29                            | 0.27 | -657.58          | 0.15                    | -657.42 |
| O                 | 0.06                            | 0.51 | -660.56          | -0.23                   | -660.79 |
| CO                | 0.16                            | 1.07 | -668.32          | -0.55                   | -668.87 |
| CO <sub>2</sub>   | 0.32                            | 1.50 | -676.60          | -0.66                   | -677.26 |
| H <sub>2</sub>    | 0.33                            | 1.16 | -660.05          | -0.43                   | -660.48 |
| CH <sub>3</sub> O | 1.07                            | 1.95 | -681.24          | -0.14                   | -681.38 |
| CH <sub>2</sub> O | 0.83                            | 1.25 | -676.88          | 0.15                    | -676.73 |
| CHO               | 0.55                            | 1.11 | -673.90          | -0.10                   | -674.00 |

**Table S17.** The zero-point energies (ZPE), the product of the vibrational entropy and temperature (TS), the optimized structural energies ( $E_{\text{SCF}}$ ), the Gibbs free energy correction values ( $G_{\text{correction}}$ ), the Gibbs free energies (G) for gas-phase molecules adsorbed on the surface of Zn and Nd co-substituted  $\text{CeO}_2$  (111) have been obtained from the frequency calculations at 1073.15K.

| intermediates         | Zn and Nd co-substituted $\text{CeO}_2$ (111) |      |                  |                         |         |
|-----------------------|-----------------------------------------------|------|------------------|-------------------------|---------|
|                       | ZPE                                           | TS   | $E_{\text{SCF}}$ | $G_{\text{correction}}$ | G       |
| $\text{CH}_4$         | 1.21                                          | 1.34 | -667.58          | 0.40                    | -667.18 |
| $\text{CH}_3$         | 1.01                                          | 1.25 | -665.66          | 0.27                    | -665.39 |
| $\text{CH}_2$         | 0.69                                          | 1.07 | -660.92          | 0.04                    | -660.88 |
| CH                    | 0.38                                          | 0.70 | -656.04          | -0.01                   | -656.06 |
| C                     | 0.10                                          | 0.36 | -652.96          | -0.15                   | -653.11 |
| H                     | 0.28                                          | 0.32 | -649.40          | 0.10                    | -649.30 |
| O                     | 0.03                                          | 0.42 | -647.92          | -0.23                   | -648.15 |
| CO                    | 0.26                                          | 0.34 | -661.33          | 0.11                    | -661.22 |
| $\text{CO}_2$         | 0.33                                          | 1.79 | -666.74          | -0.86                   | -667.60 |
| $\text{H}_2$          | 0.33                                          | 1.16 | -650.12          | -0.43                   | -650.55 |
| $\text{CH}_3\text{O}$ | 1.11                                          | 1.44 | -669.62          | 0.29                    | -669.33 |
| $\text{CH}_2\text{O}$ | 0.75                                          | 1.49 | -666.48          | -0.17                   | -666.65 |
| CHO                   | 0.55                                          | 1.03 | -665.83          | -0.01                   | -665.84 |
